# Supplementary material for: High-efficiency narrowband multi-resonance TADF emitters via the introduction of bulky adamantane units
Source: Royal Society of Chemistry journal article supplement (doi:10.1039/d4tc00429a), 2024-01-01
Supplement: d4tc00429a1.pdf [file d4tc00429a1.pdf]

## Electronic Supporting Information

### High-efficiency narrowband multi-resonance TADF emitter via the introduction of bulky adamantane unit

Yanyu Qi <sup>#a</sup>, Zehua Zhang <sup>#a</sup>, Weidong Sun <sup>#c</sup>, Shaohua Wu <sup>a</sup>, Jianting Liu <sup>a</sup>, Zhongkui Lin <sup>a</sup>, Pengcheng Jiang <sup>\*a</sup>, Haitao Yu <sup>\*a</sup>, Liang Zhou <sup>\*c</sup>, and Guangzhao Lu <sup>\*b</sup>

<sup>a</sup> Hebei Key Laboratory of Organic Functional Molecules, College of Chemistry and Materials Science, Hebei Normal University, Shijiazhuang ,050024, PR China

<sup>b</sup> Shenzhen Institute of Information Technology, Shenzhen, 518172, China.

<sup>c</sup> State Key Laboratory of Rare Earth Resource Utilization, Changchun Institute of Applied Chemistry, Chinese Academy of Sciences, Changchun 130022, China.

<sup>#</sup> These authors contributed equally to this work.

E-mail: pcjiang22@hebtu.edu.cn, zhoul@ciac.ac.cn, lugz@szit.edu.cn, haitaoyu@hebtu.edu.cn

## Table of Contents

|                                                           |     |
|-----------------------------------------------------------|-----|
| <b>Synthesis</b> .....                                    | S2  |
| <b>Quantum Chemical Calculations</b> .....                | S3  |
| <b>Thermal and Electrochemical Characterization</b> ..... | S3  |
| <b>Photophysical Characterization</b> .....               | S4  |
| <b>Single Crystal X-ray Crystallographic Data</b> .....   | S4  |
| <b>Analysis of Rate Constants</b> .....                   | S5  |
| <b>Device Fabrication and Measurement</b> .....           | S6  |
| <b>Figures, Tables and Schemes</b> .....                  | S7  |
| <b>References</b> .....                                   | S25 |

## Synthesis

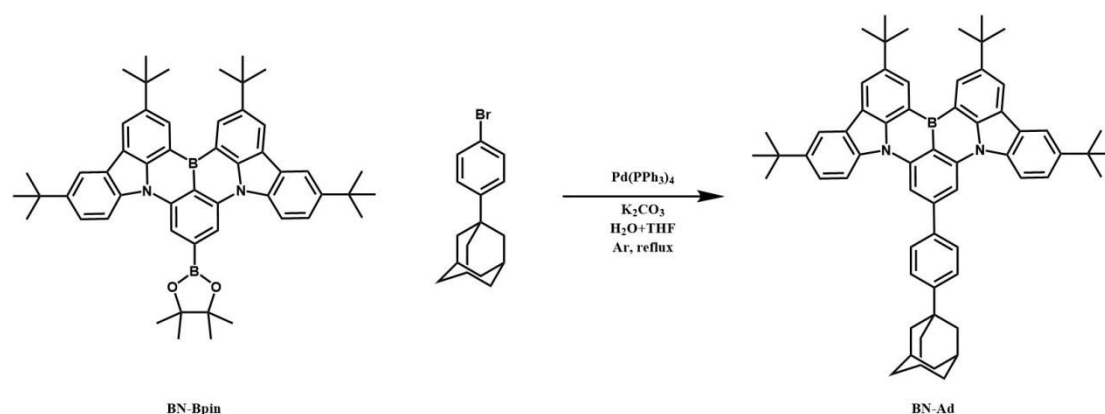

A mixture of 1-(4-bromophenyl)adamantane (291 mg, 1 mmol) and BN-Bpin (767 mg, 1 mmol) in mixed solution of THF and 4 M K<sub>2</sub>CO<sub>3</sub> (5:1, v/v) was degassed before Pd(PPh<sub>3</sub>)<sub>4</sub> (115 mg, 0.1 mmol) was added. And the mixture was refluxed under Ar for 1 day. After the reaction was finished, the organic layer was separated, washed with water, dried with Na<sub>2</sub>SO<sub>4</sub>, filtered and moved out with rotary evaporator. The residue was chromatographically purified on silica gel column with DCM/PE (1:15, v/v) to give **BN-Ad** as a yellow solid (366 mg, 43%). <sup>1</sup>H NMR (600 MHz, Chloroform-*d*) δ 9.07 (2H, s), 8.37-8.48 (6H, m), 8.24 (2H, s), 7.85-7.89 (2H, m), 7.65 (2H, d, *J* = 8.6 Hz), 7.62 (2H, d, *J* = 8.6 Hz) 2.19 (3H, s), 2.05 (6H, s), 1.81-1.89 (6H, t, *J*=18.0Hz), 1.66 (18H, s), 1.54 (18H, s). <sup>13</sup>C NMR (151 MHz, CDCl<sub>3</sub>) δ 151.58, 145.99, 145.20, 145.18, 144.63, 144.53, 141.76, 138.97, 138.33, 129.75, 127.57, 127.10, 125.68, 124.38, 123.57, 121.70, 120.53, 117.23, 114.22, 107.02, 43.29, 36.86, 36.29, 35.15, 34.79, 32.20, 31.85, 29.02. <sup>11</sup>B NMR (CDCl<sub>3</sub>, 193 MHz) δ (ppm): 45.26. Mass (HRMS): *m/z*, calcd. for C<sub>62</sub>H<sub>68</sub>BN<sub>2</sub><sup>+</sup>: 851.5480; found: 851.5476.

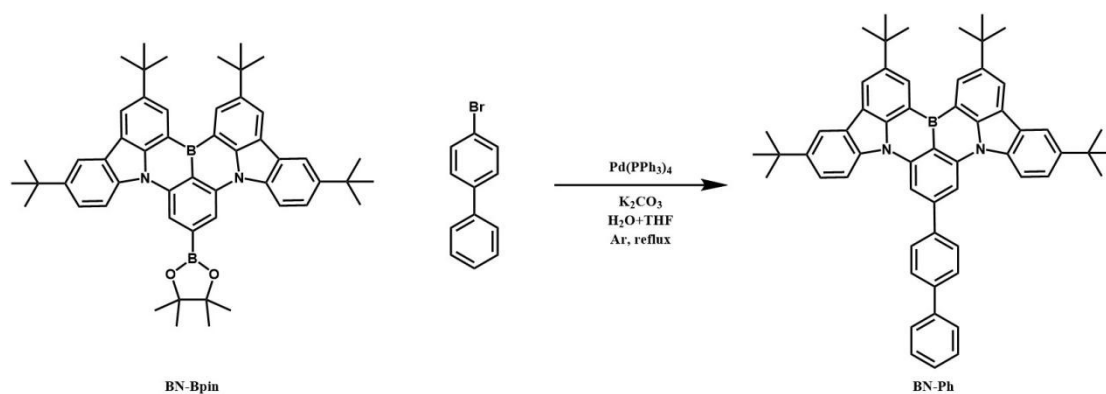

Synthesis procedure for **BN-Ph** was similar to **BN-Ad** but replacement of the reactant. Yellow solid, yield: 57%.  $^1\text{H}$  NMR (600 MHz, Chloroform-*d*)  $\delta$  9.07 (1H, s), 8.32-8.53 (7H, m), 8.23 (2H, s), 7.88-7.97 (2H, m), 7.75-7.81 (2H, m), 7.70-7.74 (2H, d,  $J = 6.0\text{Hz}$ ), 7.61-7.66 (2H, d,  $J = 6.0\text{Hz}$ ), 7.50-7.58 (2H, m), 7.42 (1H, m), 1.66 (18H, s), 1.57 (18H, s).  $^{13}\text{C}$  NMR (151 MHz,  $\text{CDCl}_3$ )  $\delta$  145.25, 144.65, 144.54, 141.74, 140.62, 138.28, 129.73, 128.91, 128.11, 127.75, 127.54, 127.13, 124.38, 123.95, 123.58, 120.58, 117.26, 114.15, 106.85, 35.16, 34.79, 32.19, 31.84.  $^{11}\text{B}$  NMR ( $\text{CDCl}_3$ , 193 MHz)  $\delta$  (ppm): 44.90. Mass (HRMS):  $m/z$ , calcd. for  $\text{C}_{58}\text{H}_{58}\text{BN}_2^+$ : 793.4697; found: 793.4693.

## Quantum Chemical Calculations

All of the simulation calculations were carried out with Gaussian 09 program package. The ground state geometries were optimized via density functional theory (DFT) calculations in vacuum using the B3LYP hybrid functional and the 6-31G(d,p) basis set. Excited state analysis by time-dependent DFT (TD-DFT) were performed at the B3LYP/6-31G(d,p) level on the basis of optimized ground-state geometries.

## Thermal and Electrochemical Characterization

Thermogravimetric analysis (TGA) was performed on TGA Q50 (TA instrument)

under nitrogen flow (10 mL min<sup>-1</sup>) at a heating rate of 10 °C min<sup>-1</sup> from 50 to 800 °C.

Cyclic voltammograms (CV) were acquired in dichloromethane at room temperature with a CHI600 electrochemical analyzer (Chenhua, China) at 25 °C and a sweep speed of 100 mV s<sup>-1</sup>. Tetrabutylammonium hexafluorophosphate (0.1 M) was applied as the supporting electrolyte. The conventional three-electrode configuration consisted of a platinum working electrode, a platinum wire auxiliary electrode and an Ag/Ag<sup>+</sup> reference electrode with ferroceniumferrocene (Fc<sup>+</sup> /Fc) as the internal standard. The HOMO energy levels of the compounds were calculated according to the formula:  $E_{\text{HOMO}}$  (eV) = -[4.8 + ( $E_{1/2(\text{ox/red})}$  -  $E_{1/2(\text{Fc}^+/\text{Fc})}$ )] eV. The LUMO energy levels of the compounds were then deduced from the HOMO levels and the UV-Vis absorption on-sets of the longer wavelength.

## Photophysical Characterization

UV-vis absorption spectra were acquired from a Shimadzu UV-2700 spectrophotometer (Shimadzu, Japan) at 25 °C. Photoluminescence (PL) spectra were recorded on an Edingburgh FS5 fluorescence spectrophotometer (Edingburgh, England) at 25 °C. Phosphorescence spectra were conducted at 77 K on a Hitachi F-4600 fluorescence spectrophotometer (Hitachi, Japan). The transient PL decay curves were obtained by Edingburgh FLS980 (Edingburgh, England) with a Picosecond Pulsed UV-LASTER (LASTER365) as the excitation source.

## Single Crystal X-ray Crystallographic Data

X-ray single crystal data of **BN-Ad** and **BN-Ph** were collected on a Bruker D8 Venture diffractometer using GaK ( $\lambda = 1.34139$ ) and MoK radiation ( $\lambda = 0.71073$ )

source. The selected crystal was kept at 150.0 K during data collection. Using Olex2<sup>[1]</sup>, the structure was solved with the ShelXT<sup>[2]</sup> structure solution program using Intrinsic Phasing and refined with the ShelXL<sup>[3]</sup> refinement package using Least Squares minimization. Selected crystal data and experimental details are listed in Table S2 and S3. All crystallographic information in CIF format have been deposited at the Cambridge Crystallographic Data Center (CCDC) under deposition number 2265333 for **BN-Ad** and 2265334 for **BN-Ph**.

### Analysis of Rate Constants

The rate constants of radiative decay ( $k_r$ ) and nonradiative decay ( $k_{nr}$ ), the rate constants of intersystem crossing ( $k_{ISC}$ ) and reverse intersystem crossing ( $k_{RISC}$ ) could be estimated using the following equations.<sup>[4-6]</sup>

$$k_r = \Phi_p k_p + \Phi_d k_d \approx \Phi_p k_p \dots \dots \dots \text{Eq.(1)}$$

$$k_{nr} = \frac{1 - \Phi_{PL}}{\Phi_{PL}} k_r \dots \dots \dots \text{Eq.(2)}$$

$$k_{ISC} = k_p - k_r - k_{nr} \dots \dots \dots \text{Eq.(3)}$$

$$k_{RISC} = (k_p k_d \Phi_d) / (k_{ISC} \Phi_p) \dots \dots \dots \text{Eq.(4)}$$

Where  $k_p$  and  $k_d$  represent the decay rate constants for prompt and delayed fluorescence, respectively, which are in reciprocal relationship with the decay time constants ( $\tau_p$  and  $\tau_d$ ) experimentally determined from transient PL characteristics.  $\Phi_p$  and  $\Phi_d$  indicate prompt and delayed fluorescence components and can be distinguished from the total  $\Phi_{PL}$  by comparing the integrated intensities of prompt ( $r_p$ ) and delayed components ( $r_d$ ) in the transient PL spectra.  $r_p$  and  $r_d$  were determined using  $\tau_p$  and  $\tau_d$

and fitting parameter ( $A_p, A_d$ ) as follows.

$$I(t) = A_p e^{-\frac{t}{\tau_p}} + A_d e^{-\frac{t}{\tau_d}} \dots \dots \dots \text{Eq.(5)}$$

$$r_p = A_p \tau_p / (A_p \tau_p + A_d \tau_d) \dots \dots \dots \text{Eq.(6)}$$

$$r_d = A_d \tau_d / (A_p \tau_p + A_d \tau_d) \dots \dots \dots \text{Eq.(7)}$$

## Device Fabrication and Measurement

The ITO coated glass substrates with a sheet resistance of  $15 \Omega \text{ square}^{-1}$  were consecutively ultrasonicated with acetone/ethanol and dried with nitrogen gas flow, followed by 20 min ultraviolet light-ozone (UVO) treatment in a UV-ozone surface processor (PL16 series, Sen Lights Corporation). Then the sample was transferred to the deposition system. Both 8-hydroxyquinolinolato-lithium (Liq) as electron injection layer and aluminum (Al) as cathode layer were deposited by thermal evaporation at  $5 \times 10^{-5} \text{ Pa}$ . Additionally, the organic layers were deposited at the rates of 0.2-3 Å/s. After the organic film deposition, Liq and Al layer were deposited with rates of 0.1 and 3 Å/s, respectively. The emitting area of the device is about  $0.09 \text{ cm}^2$ . The current density-voltage-luminance ( $J$ - $V$ - $L$ ),  $L$ - $EQE$  curves and electroluminescence spectra were measured using a Keithley 2400 source meter and an absolute EQE measurement system (C9920-12, Hamamatsu Photonics, Japan).

## Figures, Tables and Schemes

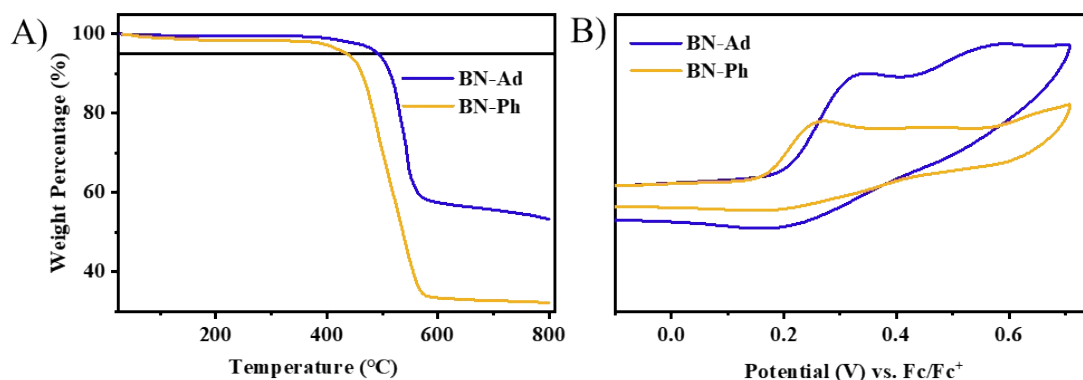

**Fig. S1.** A) Thermal gravimetric analysis (TGA) curves of **BN-Ad** and **BN-Ph** at a heating rate of  $10\text{ }^{\circ}\text{C min}^{-1}$ ; B) cyclic voltammograms (CV, oxidation) of **BN-Ad** and **BN-Ph**.

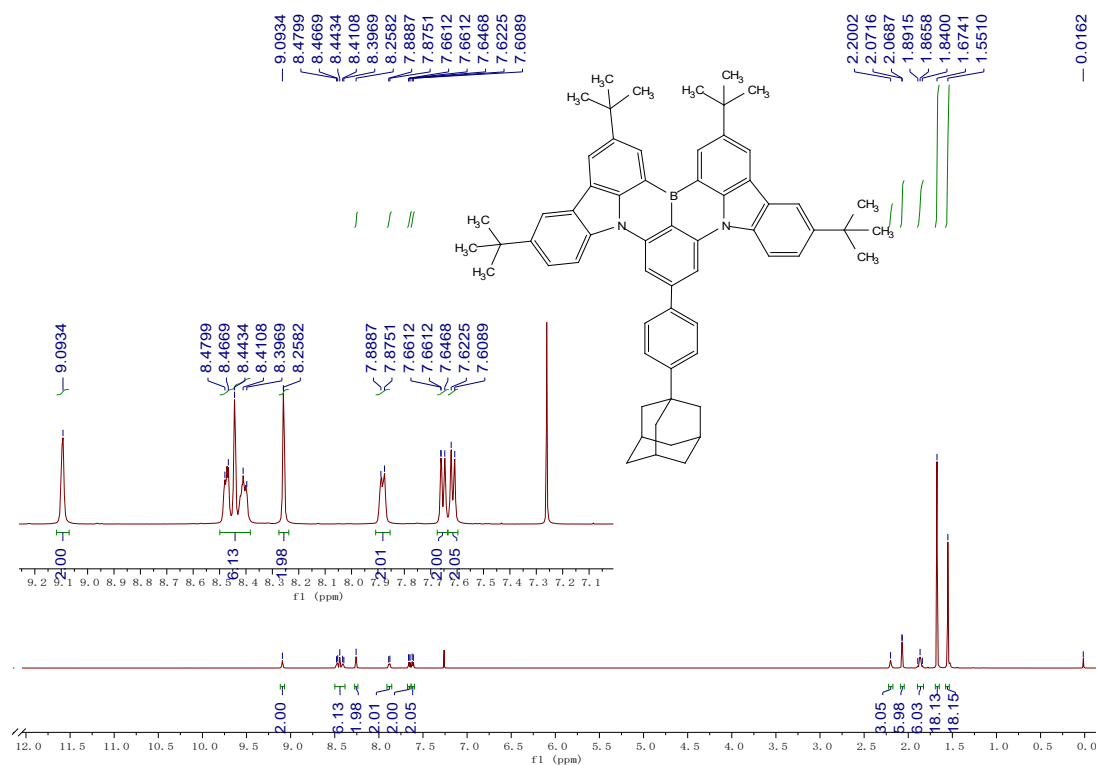

**Fig. S2.**  $^1\text{H}$  NMR spectrum of **BN-Ad** in  $\text{CDCl}_3$  (600 MHz,  $25\text{ }^{\circ}\text{C}$ ).

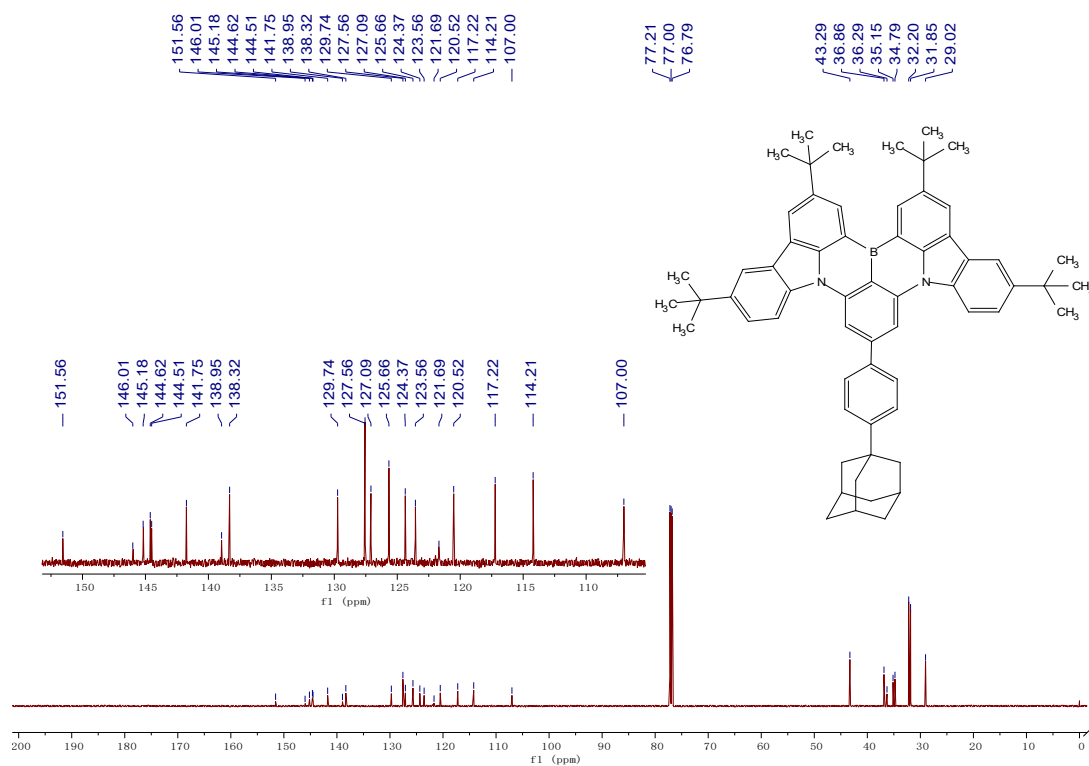

**Fig. S3.**  $^{13}\text{C}$  NMR spectrum of **BN-Ad** in  $\text{CDCl}_3$  (151 MHz, 25 °C).

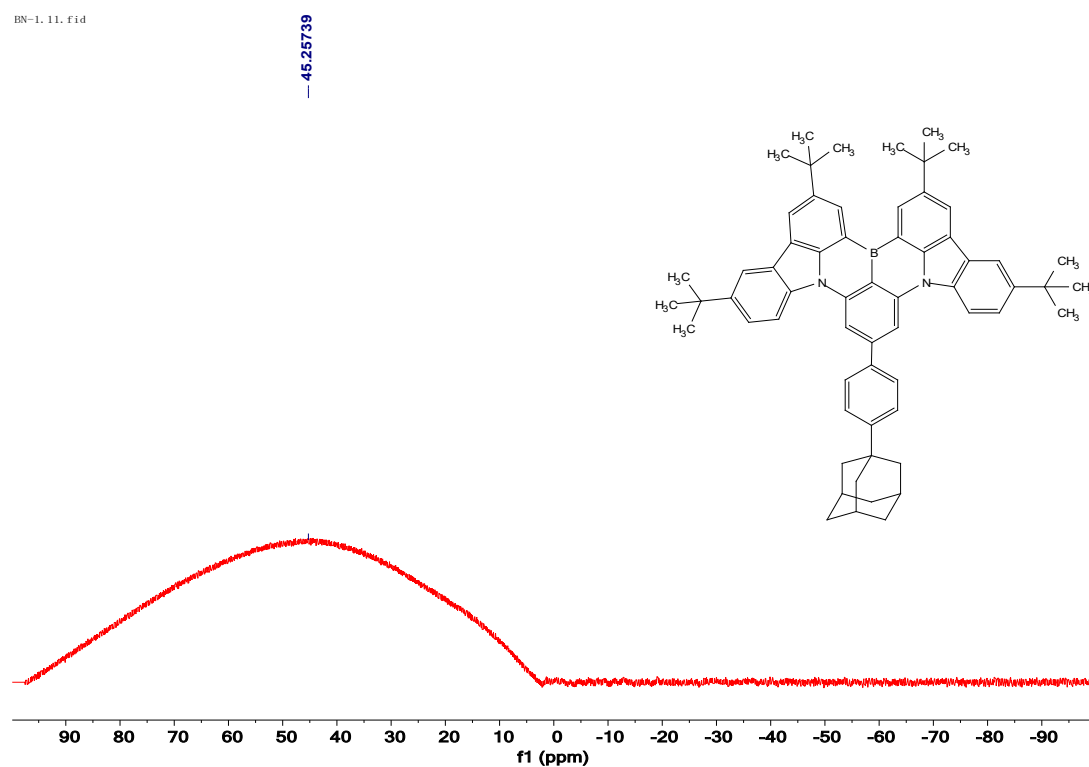

**Fig. S4.**  $^{11}\text{B}$  NMR spectrum of **BN-Ad** in  $\text{CDCl}_3$  (193 MHz, 25 °C).



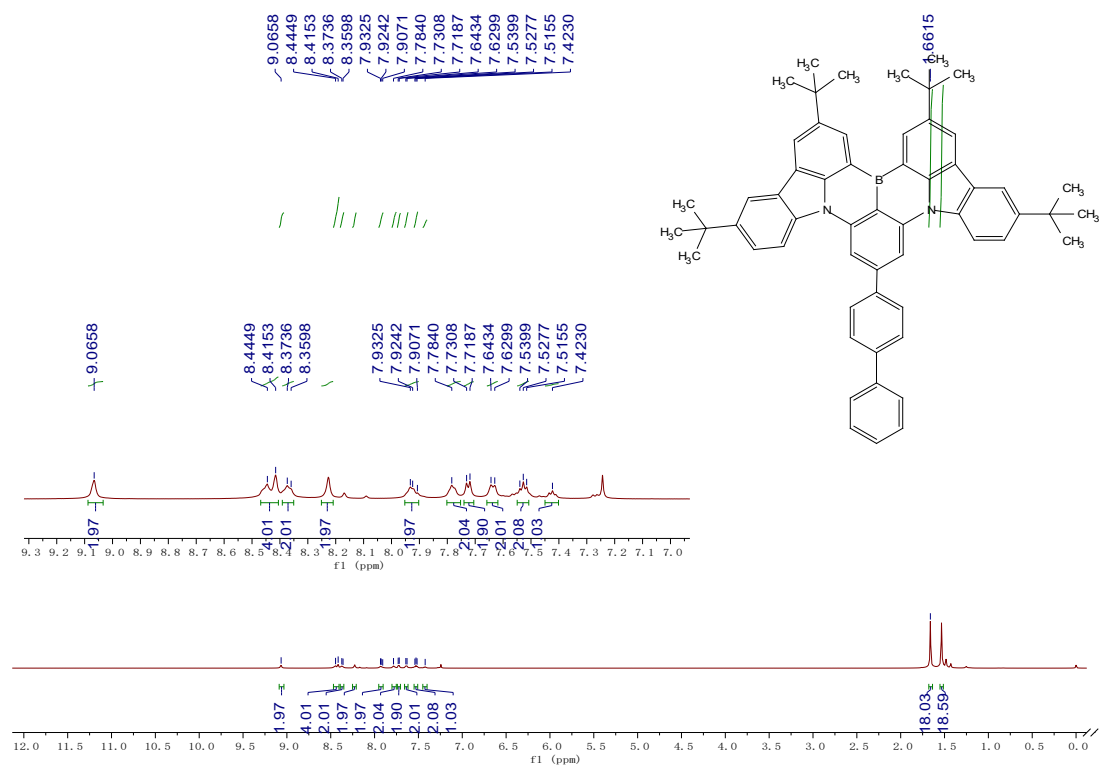

**Fig. S5.** <sup>1</sup>H NMR spectrum of BN-Ph in CDCl<sub>3</sub> (600 MHz, 25 °C).

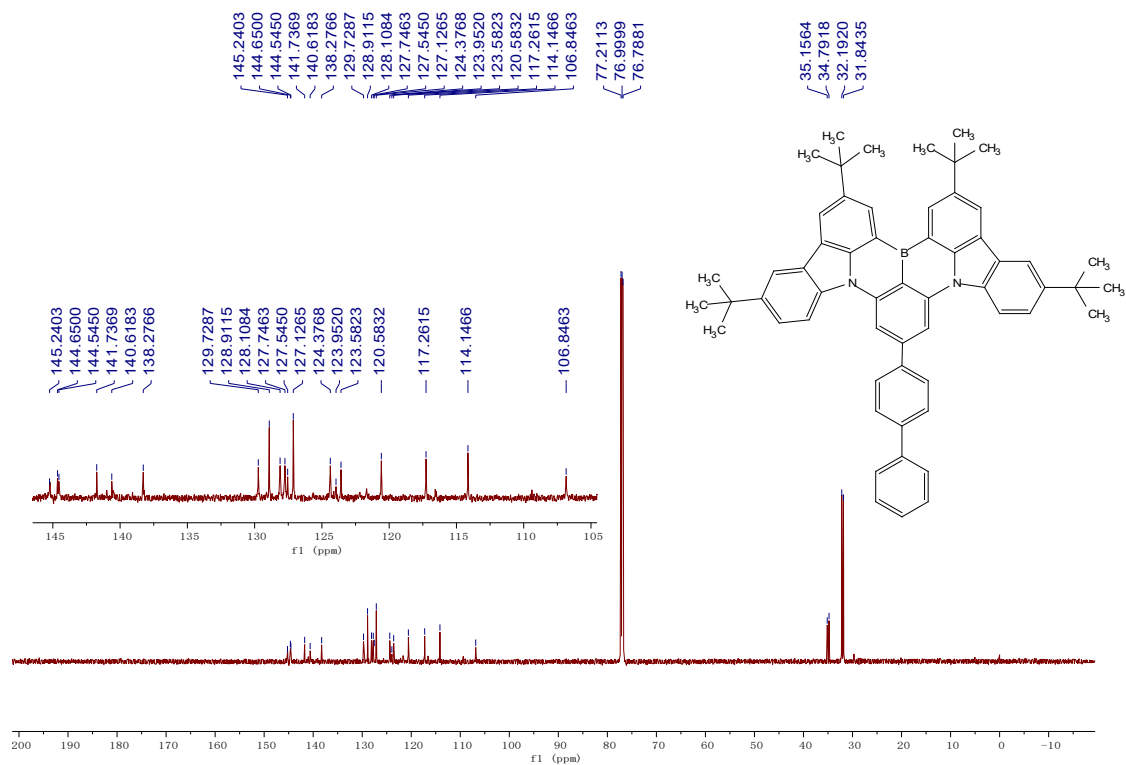

**Fig. S6.** <sup>13</sup>C NMR spectrum of BN-Ph in CDCl<sub>3</sub> (151 MHz, 25 °C).

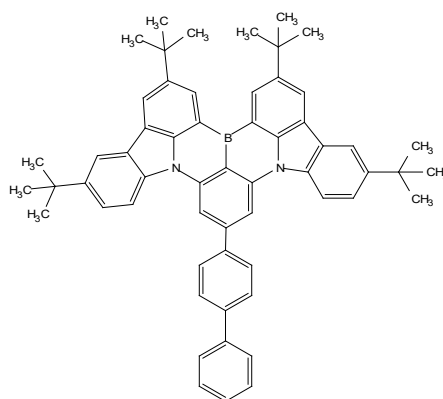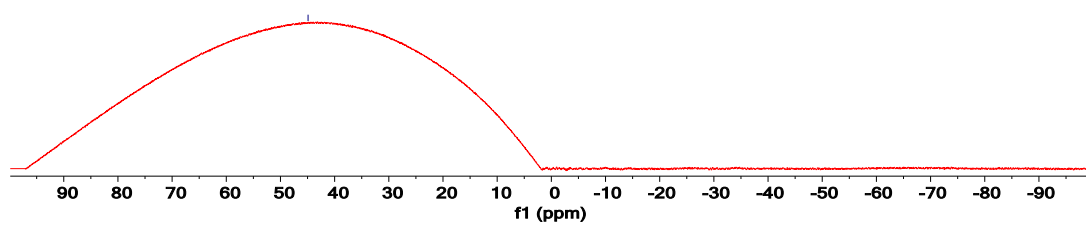

**Fig. S7.**  $^{11}\text{B}$  NMR spectrum of **BN-Ph** in  $\text{CDCl}_3$  (193 MHz, 25 °C).

### Display Report

#### Analysis Info

Analysis Name D:\Data\2023\0505\dnn-1.d  
 Method pos\_low-20151116.m  
 Sample Name dingnannan  
 Comment

Acquisition Date 2023-05-05 10:21:59  
 Operator Fan  
 Instrument maXis 10103

#### Acquisition Parameter

|             |            |                       |           |                  |           |
|-------------|------------|-----------------------|-----------|------------------|-----------|
| Source Type | APCI       | Ion Polarity          | Positive  | Set Nebulizer    | 1.6 Bar   |
| Focus       | Not active | Set Capillary         | 2000 V    | Set Dry Heater   | 200 °C    |
| Scan Begin  | 100 m/z    | Set End Plate Offset  | -500 V    | Set Dry Gas      | 2.5 l/min |
| Scan End    | 1000 m/z   | Set Collision Cell RF | 200.0 Vpp | Set Divert Valve | Waste     |

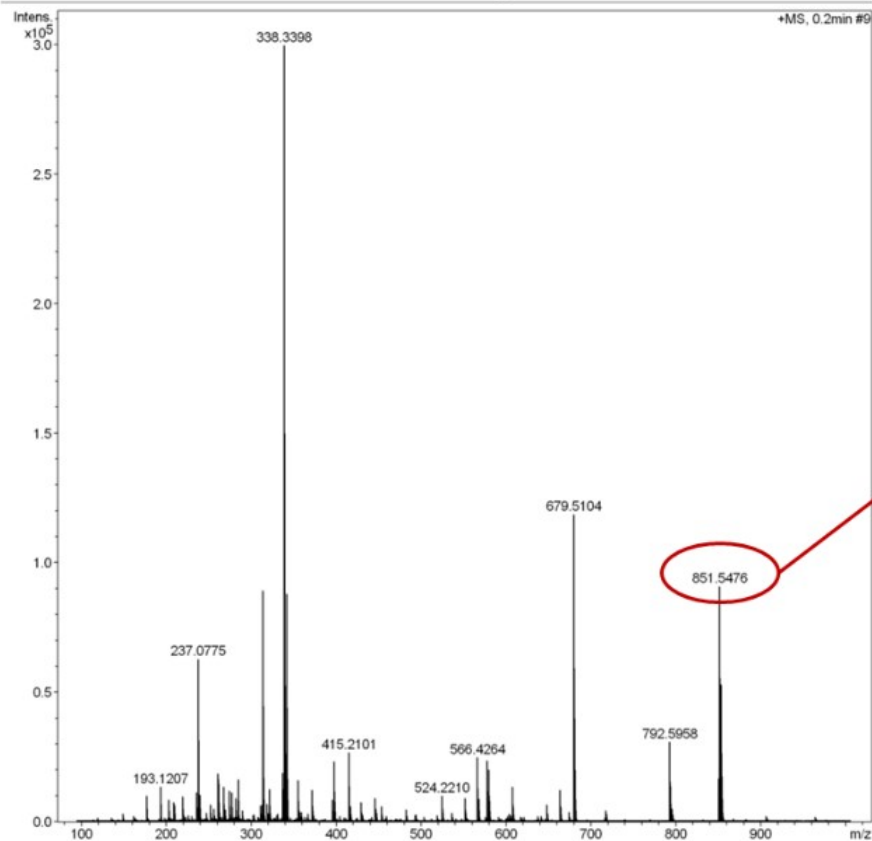

### Display Report

#### Analysis Info

Analysis Name D:\Data\2023\0505\dnn-1.d  
 Method pos\_low-20151116.m  
 Sample Name dingnannan  
 Comment

Acquisition Date 2023-05-05 10:21:59  
 Operator Fan  
 Instrument maXis 10103

#### Acquisition Parameter

|             |            |                       |           |                  |           |
|-------------|------------|-----------------------|-----------|------------------|-----------|
| Source Type | APCI       | Ion Polarity          | Positive  | Set Nebulizer    | 1.6 Bar   |
| Focus       | Not active | Set Capillary         | 2000 V    | Set Dry Heater   | 200 °C    |
| Scan Begin  | 100 m/z    | Set End Plate Offset  | -500 V    | Set Dry Gas      | 2.5 l/min |
| Scan End    | 1000 m/z   | Set Collision Cell RF | 200.0 Vpp | Set Divert Valve | Waste     |

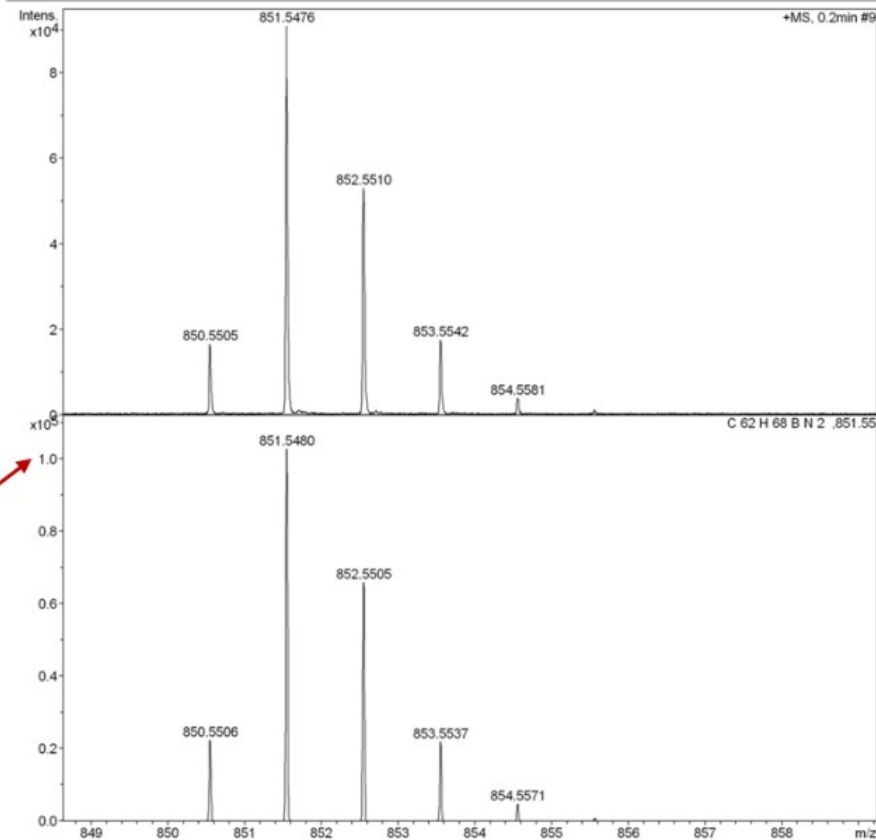

Fig. S8. HR-MS spectrum of BN-Ad.

### Display Report

#### Analysis Info

Analysis Name D:\Data\2023\0505\dnn-2.d  
 Method pos\_low-20151116.m  
 Sample Name dingnannan  
 Comment

Acquisition Date 2023-05-05 10:24:16  
 Operator Fan  
 Instrument maXis 10103

#### Acquisition Parameter

|             |            |                       |           |                  |           |
|-------------|------------|-----------------------|-----------|------------------|-----------|
| Source Type | APCI       | Ion Polarity          | Positive  | Set Nebulizer    | 1.6 Bar   |
| Focus       | Not active | Set Capillary         | 2000 V    | Set Dry Heater   | 200 °C    |
| Scan Begin  | 100 m/z    | Set End Plate Offset  | -500 V    | Set Dry Gas      | 2.5 l/min |
| Scan End    | 1000 m/z   | Set Collision Cell RF | 200.0 Vpp | Set Divert Valve | Waste     |

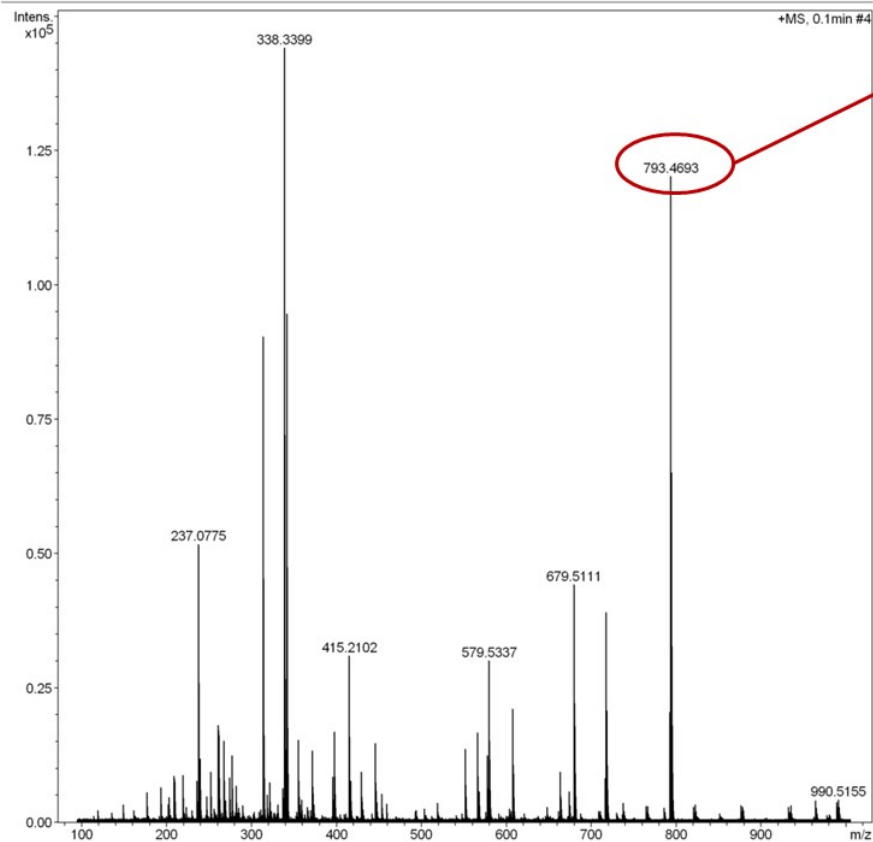

### Display Report

#### Analysis Info

Analysis Name D:\Data\2023\0505\dnn-2.d  
 Method pos\_low-20151116.m  
 Sample Name dingnannan  
 Comment

Acquisition Date 2023-05-05 10:24:16  
 Operator Fan  
 Instrument maXis 10103

#### Acquisition Parameter

|             |            |                       |           |                  |           |
|-------------|------------|-----------------------|-----------|------------------|-----------|
| Source Type | APCI       | Ion Polarity          | Positive  | Set Nebulizer    | 1.6 Bar   |
| Focus       | Not active | Set Capillary         | 2000 V    | Set Dry Heater   | 200 °C    |
| Scan Begin  | 100 m/z    | Set End Plate Offset  | -500 V    | Set Dry Gas      | 2.5 l/min |
| Scan End    | 1000 m/z   | Set Collision Cell RF | 200.0 Vpp | Set Divert Valve | Waste     |

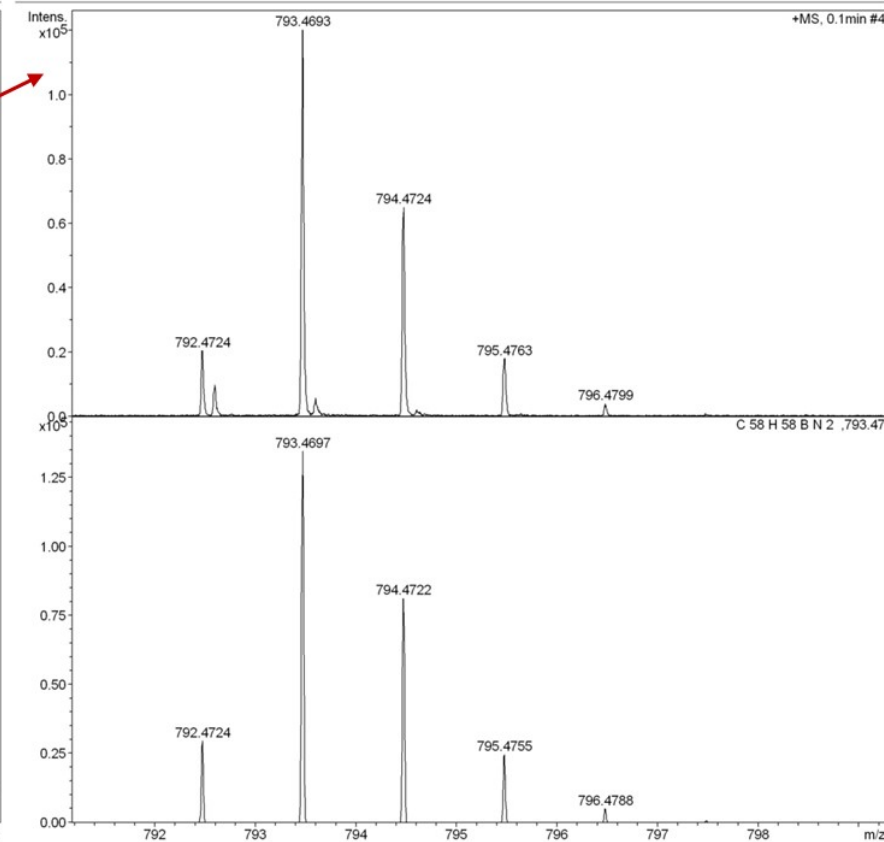

Fig. S9. HR-MS spectrum of BN-Ph.

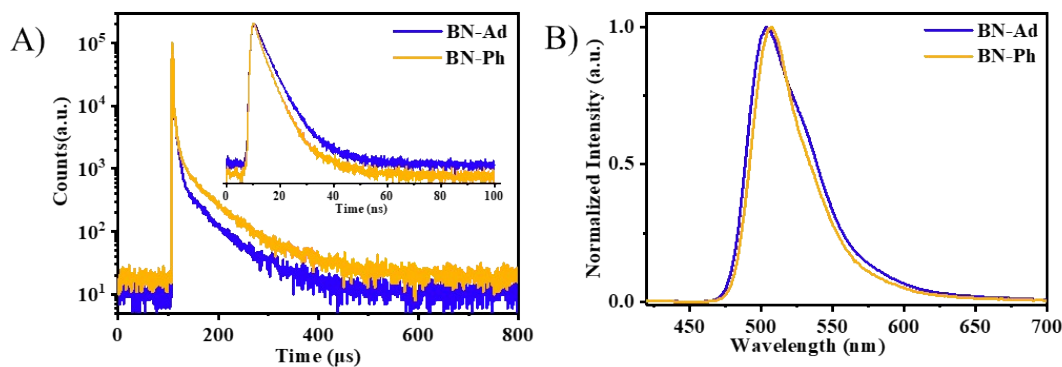

**Fig. S10.** A) transient photoluminescence decay curves of 6 wt% emitters doped in mCBP films; B) photoluminescence curves of **BN-Ad** and **BN-Ph** 6 wt% doped in mCBP films.

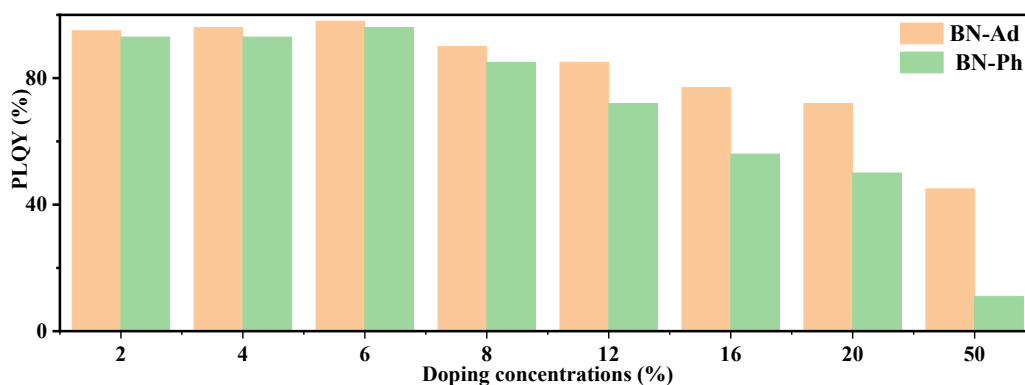

**Fig. S11.** PLQY of **BN-Ad** and **BN-Ph** doped in mCBP versus doping concentrations.

**Table S1.** Thermal and electrochemical properties of **BN-Ad** and **BN-Ph**.

| Compound     | $T_d^a$<br>(°C) | $E_{\text{HOMO}}^b$<br>(eV) | $E_{\text{LUMO}}^c$<br>(eV) | $E_g^d$<br>(eV) |
|--------------|-----------------|-----------------------------|-----------------------------|-----------------|
| <b>BN-Ad</b> | 493             | -5.01                       | -2.48                       | 2.53            |
| <b>BN-Ph</b> | 436             | -4.97                       | -2.44                       | 2.53            |

<sup>a</sup> Obtained from thermal gravimetric analysis (TGA) measurements; <sup>b</sup> determined from the onset of the oxidation potentials by cyclic voltammetry (CV); <sup>c</sup> calculated by using HOMO levels and  $E_{gS}$ , where  $E_{\text{LUMO}} = E_{\text{HOMO}} + E_g$ ; <sup>d</sup> estimated from the onset of the absorption spectra.

**Table S2.** Crystal data and structure refinement for **BN-Ad**.

|                     |                        |
|---------------------|------------------------|
| Identification code | 230317LU_LGPZ085847_0m |
|---------------------|------------------------|

---

|                                             |                                                                 |
|---------------------------------------------|-----------------------------------------------------------------|
| Empirical formula                           | C <sub>63</sub> H <sub>69</sub> BCl <sub>2</sub> N <sub>2</sub> |
| Formula weight                              | 935.91                                                          |
| Temperature/K                               | 193.00                                                          |
| Crystal system                              | triclinic                                                       |
| Space group                                 | P-1                                                             |
| a/Å                                         | 11.7271(8)                                                      |
| b/Å                                         | 15.7392(10)                                                     |
| c/Å                                         | 17.3908(11)                                                     |
| α/°                                         | 66.260(3)                                                       |
| β/°                                         | 72.704(4)                                                       |
| γ/°                                         | 75.147(4)                                                       |
| Volume/Å <sup>3</sup>                       | 2770.9(3)                                                       |
| Z                                           | 2                                                               |
| ρ <sub>calc</sub> /g/cm <sup>3</sup>        | 1.122                                                           |
| μ/mm <sup>-1</sup>                          | 0.881                                                           |
| F(000)                                      | 1000.0                                                          |
| Crystal size/mm <sup>3</sup>                | 0.13 × 0.12 × 0.1                                               |
| Radiation                                   | GaKα (λ = 1.34139)                                              |
| 2θ range for data collection/°              | 4.95 to 120.708                                                 |
| Index ranges                                | -14 ≤ h ≤ 15, -18 ≤ k ≤ 20, -22 ≤ l ≤ 22                        |
| Reflections collected                       | 31407                                                           |
| Independent reflections                     | 12120 [R <sub>int</sub> = 0.0746, R <sub>sigma</sub> = 0.0918]  |
| Data/restraints/parameters                  | 12120/378/717                                                   |
| Goodness-of-fit on F <sup>2</sup>           | 1.037                                                           |
| Final R indexes [I ≥ 2σ (I)]                | R <sub>1</sub> = 0.0769, wR <sub>2</sub> = 0.2042               |
| Final R indexes [all data]                  | R <sub>1</sub> = 0.1473, wR <sub>2</sub> = 0.2523               |
| Largest diff. peak/hole / e Å <sup>-3</sup> | 0.39/-0.52                                                      |

---

**Table S3.** Crystal data and structure refinement for **BN-Ph**.

|                                             |                                                               |
|---------------------------------------------|---------------------------------------------------------------|
| Identification code                         | cu_230511_WQANGZ_061145_0m                                    |
| Empirical formula                           | C <sub>58</sub> H <sub>57</sub> BN <sub>2</sub>               |
| Formula weight                              | 792.86                                                        |
| Temperature/K                               | 193.00                                                        |
| Crystal system                              | triclinic                                                     |
| Space group                                 | P-1                                                           |
| a/Å                                         | 5.7146(2)                                                     |
| b/Å                                         | 17.2543(5)                                                    |
| c/Å                                         | 22.4781(8)                                                    |
| α/°                                         | 101.701(2)                                                    |
| β/°                                         | 93.212(2)                                                     |
| γ/°                                         | 90.068(2)                                                     |
| Volume/Å <sup>3</sup>                       | 2166.73(13)                                                   |
| Z                                           | 2                                                             |
| ρ <sub>calc</sub> /cm <sup>3</sup>          | 1.215                                                         |
| μ/mm <sup>-1</sup>                          | 0.521                                                         |
| F(000)                                      | 848.0                                                         |
| Crystal size/mm <sup>3</sup>                | 0.13 × 0.12 × 0.1                                             |
| Radiation                                   | CuKα (λ = 1.54178)                                            |
| 2θ range for data collection/°              | 4.02 to 159.906                                               |
| Index ranges                                | -6 ≤ h ≤ 7, -20 ≤ k ≤ 21, -28 ≤ l ≤ 28                        |
| Reflections collected                       | 24575                                                         |
| Independent reflections                     | 8507 [R <sub>int</sub> = 0.0558, R <sub>sigma</sub> = 0.0564] |
| Data/restraints/parameters                  | 8507/0/563                                                    |
| Goodness-of-fit on F <sup>2</sup>           | 1.032                                                         |
| Final R indexes [I ≥ 2σ (I)]                | R <sub>1</sub> = 0.0680, wR <sub>2</sub> = 0.1946             |
| Final R indexes [all data]                  | R <sub>1</sub> = 0.0975, wR <sub>2</sub> = 0.2190             |
| Largest diff. peak/hole / e Å <sup>-3</sup> | 0.74/-0.23                                                    |

**Table S4.** Cartesian coordinates of **BN-Ad** at the optimized  $S_0$  geometry.

| Center<br>Number | Atomic<br>Number | Atomic<br>Type | Coordinates (Angstroms) |           |           |
|------------------|------------------|----------------|-------------------------|-----------|-----------|
|                  |                  |                | X                       | Y         | Z         |
| 1                | 6                | 0              | 1.809396                | -4.640047 | 0.086627  |
| 2                | 6                | 0              | 1.630712                | -6.024577 | 0.032959  |
| 3                | 6                | 0              | 0.378500                | -6.569133 | -0.263749 |
| 4                | 6                | 0              | -0.672457               | -5.668264 | -0.530035 |
| 5                | 6                | 0              | -0.524291               | -4.283648 | -0.478862 |
| 6                | 6                | 0              | 0.723959                | -3.755613 | -0.135384 |
| 7                | 7                | 0              | 1.195626                | -2.421055 | -0.023824 |
| 8                | 6                | 0              | 2.574489                | -2.482501 | 0.181315  |
| 9                | 6                | 0              | 2.990900                | -3.824460 | 0.291490  |
| 10               | 6                | 0              | 3.450854                | -1.394694 | 0.240874  |
| 11               | 6                | 0              | 4.800958                | -1.725410 | 0.499700  |
| 12               | 6                | 0              | 5.262623                | -3.040515 | 0.654678  |
| 13               | 6                | 0              | 4.332996                | -4.094103 | 0.531224  |
| 14               | 6                | 0              | 0.534969                | 1.237960  | 0.013225  |
| 15               | 6                | 0              | -0.862697               | 1.247664  | -0.036460 |
| 16               | 6                | 0              | -1.581613               | 0.048871  | 0.017454  |
| 17               | 6                | 0              | -0.897417               | -1.169950 | 0.064959  |
| 18               | 6                | 0              | 0.499875                | -1.199899 | 0.004456  |
| 19               | 6                | 0              | 1.265192                | 0.008120  | 0.005779  |
| 20               | 7                | 0              | 1.265203                | 2.439110  | 0.037062  |
| 21               | 5                | 0              | 2.808009                | -0.014649 | 0.000559  |
| 22               | 6                | 0              | 0.832497                | 3.786107  | 0.150374  |
| 23               | 6                | 0              | 1.942345                | 4.638353  | -0.079309 |
| 24               | 6                | 0              | 3.097442                | 3.788907  | -0.291751 |
| 25               | 6                | 0              | 2.644029                | 2.462459  | -0.178314 |
| 26               | 6                | 0              | -0.397839               | 4.350625  | 0.501042  |



|    |   |   |            |           |           |
|----|---|---|------------|-----------|-----------|
| 27 | 6 | 0 | -0.505265  | 5.738831  | 0.552212  |
| 28 | 6 | 0 | 0.570231   | 6.608515  | 0.278930  |
| 29 | 6 | 0 | 1.804028   | 6.027857  | -0.025353 |
| 30 | 6 | 0 | 4.448411   | 4.025014  | -0.542573 |
| 31 | 6 | 0 | 5.342228   | 2.947902  | -0.671582 |
| 32 | 6 | 0 | 4.841258   | 1.642627  | -0.511603 |
| 33 | 6 | 0 | 3.489581   | 1.347504  | -0.243840 |
| 34 | 6 | 0 | 6.840752   | 3.154309  | -0.973491 |
| 35 | 6 | 0 | 0.355425   | 8.131936  | 0.343927  |
| 36 | 6 | 0 | -0.727288  | 8.543007  | -0.682026 |
| 37 | 6 | 0 | -0.108568  | 8.531342  | 1.764865  |
| 38 | 6 | 0 | 1.641464   | 8.916254  | 0.022726  |
| 39 | 6 | 0 | 7.211773   | 4.643294  | -1.110894 |
| 40 | 6 | 0 | 7.689896   | 2.555236  | 0.172719  |
| 41 | 6 | 0 | 7.201943   | 2.447410  | -2.301519 |
| 42 | 6 | 0 | 6.739505   | -3.375498 | 0.945536  |
| 43 | 6 | 0 | 7.620906   | -2.116398 | 1.048648  |
| 44 | 6 | 0 | 6.840370   | -4.140048 | 2.287051  |
| 45 | 6 | 0 | 7.302881   | -4.261211 | -0.191287 |
| 46 | 6 | 0 | 0.119168   | -8.085616 | -0.328088 |
| 47 | 6 | 0 | 1.383256   | -8.906988 | -0.012314 |
| 48 | 6 | 0 | -0.970779  | -8.465362 | 0.702263  |
| 49 | 6 | 0 | -0.362046  | -8.470764 | -1.747230 |
| 50 | 6 | 0 | -9.616139  | 1.195305  | 0.829608  |
| 51 | 6 | 0 | -10.108482 | -0.153125 | 1.391015  |
| 52 | 6 | 0 | -9.529869  | -1.299882 | 0.539484  |
| 53 | 6 | 0 | -10.003015 | -1.145808 | -0.920455 |
| 54 | 6 | 0 | -9.518393  | 0.207580  | -1.479622 |
| 55 | 6 | 0 | -10.097190 | 1.352870  | -0.626271 |
| 56 | 6 | 0 | -7.989286  | -1.249673 | 0.589208  |

|    |   |   |           |           |           |
|----|---|---|-----------|-----------|-----------|
| 57 | 6 | 0 | -8.074702 | 1.241642  | 0.872913  |
| 58 | 6 | 0 | -7.977710 | 0.260768  | -1.434025 |
| 59 | 6 | 0 | -7.456636 | 0.100718  | 0.025002  |
| 60 | 6 | 0 | -5.923943 | 0.111534  | 0.041374  |
| 61 | 6 | 0 | -5.203737 | -0.860066 | -0.675599 |
| 62 | 6 | 0 | -3.813538 | -0.883513 | -0.685345 |
| 63 | 6 | 0 | -3.065901 | 0.070413  | 0.024982  |
| 64 | 6 | 0 | -3.778231 | 1.041771  | 0.741210  |
| 65 | 6 | 0 | -5.172860 | 1.060449  | 0.748742  |
| 66 | 1 | 0 | 2.485324  | -6.666396 | 0.213682  |
| 67 | 1 | 0 | -1.650356 | -6.056140 | -0.797901 |
| 68 | 1 | 0 | -1.365956 | -3.661167 | -0.744132 |
| 69 | 1 | 0 | 5.505504  | -0.910065 | 0.597668  |
| 70 | 1 | 0 | 4.662051  | -5.124716 | 0.627515  |
| 71 | 1 | 0 | -1.405174 | 2.168717  | -0.172940 |
| 72 | 1 | 0 | -1.464714 | -2.075154 | 0.206690  |
| 73 | 1 | 0 | -1.255730 | 3.753201  | 0.772037  |
| 74 | 1 | 0 | -1.469736 | 6.155261  | 0.825852  |
| 75 | 1 | 0 | 2.675830  | 6.644398  | -0.211875 |
| 76 | 1 | 0 | 4.798526  | 5.046190  | -0.640506 |
| 77 | 1 | 0 | 5.529572  | 0.810855  | -0.613939 |
| 78 | 1 | 0 | -0.898038 | 9.624954  | -0.645165 |
| 79 | 1 | 0 | -0.420717 | 8.281532  | -1.700019 |
| 80 | 1 | 0 | -1.683084 | 8.048619  | -0.485041 |
| 81 | 1 | 0 | -0.269665 | 9.613757  | 1.823942  |
| 82 | 1 | 0 | 0.642826  | 8.258049  | 2.512769  |
| 83 | 1 | 0 | -1.046782 | 8.041103  | 2.040836  |
| 84 | 1 | 0 | 2.011079  | 8.697156  | -0.984365 |
| 85 | 1 | 0 | 1.440587  | 9.991173  | 0.073720  |
| 86 | 1 | 0 | 2.441777  | 8.696825  | 0.737044  |

|     |   |   |            |           |           |
|-----|---|---|------------|-----------|-----------|
| 87  | 1 | 0 | 8.280824   | 4.738027  | -1.326702 |
| 88  | 1 | 0 | 6.667026   | 5.125831  | -1.929082 |
| 89  | 1 | 0 | 7.011900   | 5.200720  | -0.189774 |
| 90  | 1 | 0 | 8.758107   | 2.693761  | -0.029691 |
| 91  | 1 | 0 | 7.511994   | 1.482786  | 0.294418  |
| 92  | 1 | 0 | 7.458742   | 3.041422  | 1.126137  |
| 93  | 1 | 0 | 7.002858   | 1.372714  | -2.258405 |
| 94  | 1 | 0 | 6.622472   | 2.859740  | -3.133943 |
| 95  | 1 | 0 | 8.265898   | 2.580425  | -2.528704 |
| 96  | 1 | 0 | 8.655247   | -2.407628 | 1.258045  |
| 97  | 1 | 0 | 7.623403   | -1.543218 | 0.115614  |
| 98  | 1 | 0 | 7.294541   | -1.454646 | 1.857432  |
| 99  | 1 | 0 | 7.883997   | -4.392725 | 2.506469  |
| 100 | 1 | 0 | 6.270136   | -5.073581 | 2.268252  |
| 101 | 1 | 0 | 6.456727   | -3.532223 | 3.112874  |
| 102 | 1 | 0 | 7.251645   | -3.741487 | -1.153568 |
| 103 | 1 | 0 | 8.351383   | -4.513408 | 0.004018  |
| 104 | 1 | 0 | 6.749711   | -5.199904 | -0.290408 |
| 105 | 1 | 0 | 1.150916   | -9.975593 | -0.061924 |
| 106 | 1 | 0 | 2.186386   | -8.711316 | -0.730373 |
| 107 | 1 | 0 | 1.763606   | -8.698478 | 0.993040  |
| 108 | 1 | 0 | -1.173010  | -9.541856 | 0.665767  |
| 109 | 1 | 0 | -1.912674  | -7.943432 | 0.509392  |
| 110 | 1 | 0 | -0.652581  | -8.213335 | 1.719066  |
| 111 | 1 | 0 | -1.286858  | -7.953511 | -2.019111 |
| 112 | 1 | 0 | 0.393792   | -8.218959 | -2.498184 |
| 113 | 1 | 0 | -0.554575  | -9.548033 | -1.805961 |
| 114 | 1 | 0 | -10.013286 | 2.016130  | 1.440186  |
| 115 | 1 | 0 | -9.795304  | -0.264482 | 2.437397  |
| 116 | 1 | 0 | -11.205654 | -0.188768 | 1.380654  |

|     |   |   |            |           |           |
|-----|---|---|------------|-----------|-----------|
| 117 | 1 | 0 | -9.869909  | -2.264414 | 0.937718  |
| 118 | 1 | 0 | -11.098104 | -1.204341 | -0.970348 |
| 119 | 1 | 0 | -9.612114  | -1.969135 | -1.532911 |
| 120 | 1 | 0 | -9.849981  | 0.317113  | -2.520076 |
| 121 | 1 | 0 | -9.776020  | 2.322820  | -1.028098 |
| 122 | 1 | 0 | -11.194197 | 1.338564  | -0.665408 |
| 123 | 1 | 0 | -7.637369  | -1.374110 | 1.621385  |
| 124 | 1 | 0 | -7.574078  | -2.085588 | 0.013894  |
| 125 | 1 | 0 | -7.727991  | 2.213814  | 0.499406  |
| 126 | 1 | 0 | -7.736032  | 1.158693  | 1.913695  |
| 127 | 1 | 0 | -7.617331  | 1.213030  | -1.843964 |
| 128 | 1 | 0 | -7.562367  | -0.530586 | -2.069093 |
| 129 | 1 | 0 | -5.736961  | -1.612397 | -1.249211 |
| 130 | 1 | 0 | -3.296920  | -1.633340 | -1.277368 |
| 131 | 1 | 0 | -3.235105  | 1.776786  | 1.328101  |
| 132 | 1 | 0 | -5.671392  | 1.828498  | 1.328484  |

-----

**Table S5.** Cartesian coordinates of **BN-Ph** at the optimized  $S_0$  geometry.

| Center<br>Number | Atomic<br>Number | Atomic<br>Type | Coordinates (Angstroms) |           |           |
|------------------|------------------|----------------|-------------------------|-----------|-----------|
|                  |                  |                | X                       | Y         | Z         |
| 1                | 6                | 0              | -1.624961               | -4.480575 | -0.084710 |
| 2                | 6                | 0              | -1.618331               | -5.876527 | -0.031087 |
| 3                | 6                | 0              | -0.444242               | -6.571207 | 0.271511  |
| 4                | 6                | 0              | 0.708230                | -5.806597 | 0.543869  |
| 5                | 6                | 0              | 0.731887                | -4.414224 | 0.492523  |
| 6                | 6                | 0              | -0.440009               | -3.736582 | 0.142926  |
| 7                | 7                | 0              | -0.743318               | -2.353912 | 0.029380  |
| 8                | 6                | 0              | -2.118474               | -2.245331 | -0.181957 |

|    |   |   |           |           |           |
|----|---|---|-----------|-----------|-----------|
| 9  | 6 | 0 | -2.696256 | -3.525836 | -0.294572 |
| 10 | 6 | 0 | -2.854117 | -1.058069 | -0.244846 |
| 11 | 6 | 0 | -4.233592 | -1.220158 | -0.509362 |
| 12 | 6 | 0 | -4.852838 | -2.468444 | -0.666805 |
| 13 | 6 | 0 | -4.060293 | -3.628384 | -0.540114 |
| 14 | 6 | 0 | 0.362139  | 1.196191  | -0.009739 |
| 15 | 6 | 0 | 1.750439  | 1.034424  | 0.044175  |
| 16 | 6 | 0 | 2.316167  | -0.244079 | -0.002892 |
| 17 | 6 | 0 | 1.488079  | -1.370095 | -0.050587 |
| 18 | 6 | 0 | 0.097269  | -1.227937 | 0.003217  |
| 19 | 6 | 0 | -0.513323 | 0.065175  | -0.002800 |
| 20 | 7 | 0 | -0.214916 | 2.477517  | -0.036463 |
| 21 | 5 | 0 | -2.047586 | 0.232334  | -0.001845 |
| 22 | 6 | 0 | 0.380158  | 3.761275  | -0.149358 |
| 23 | 6 | 0 | -0.616438 | 4.743233  | 0.081122  |
| 24 | 6 | 0 | -1.867353 | 4.042160  | 0.292856  |
| 25 | 6 | 0 | -1.580620 | 2.670163  | 0.178280  |
| 26 | 6 | 0 | 1.670176  | 4.170295  | -0.501090 |
| 27 | 6 | 0 | 1.947421  | 5.534838  | -0.552332 |
| 28 | 6 | 0 | 0.987262  | 6.529960  | -0.277350 |
| 29 | 6 | 0 | -0.308287 | 6.105144  | 0.027824  |
| 30 | 6 | 0 | -3.179047 | 4.442355  | 0.543866  |
| 31 | 6 | 0 | -4.198748 | 3.483249  | 0.671323  |
| 32 | 6 | 0 | -3.862225 | 2.126502  | 0.509524  |
| 33 | 6 | 0 | -2.556863 | 1.667675  | 0.242195  |
| 34 | 6 | 0 | -5.660573 | 3.872249  | 0.973082  |
| 35 | 6 | 0 | 1.387035  | 8.015616  | -0.342411 |
| 36 | 6 | 0 | 2.518353  | 8.289515  | 0.676851  |
| 37 | 6 | 0 | 1.887392  | 8.356913  | -1.766115 |
| 38 | 6 | 0 | 0.208950  | 8.951230  | -0.012024 |

|    |   |   |           |           |           |
|----|---|---|-----------|-----------|-----------|
| 39 | 6 | 0 | -5.844546 | 5.395176  | 1.116441  |
| 40 | 6 | 0 | -6.575672 | 3.387486  | -0.176420 |
| 41 | 6 | 0 | -6.108252 | 3.210269  | 2.297875  |
| 42 | 6 | 0 | -6.358436 | -2.618965 | -0.964208 |
| 43 | 6 | 0 | -7.077782 | -1.260741 | -1.067860 |
| 44 | 6 | 0 | -6.546909 | -3.362786 | -2.307882 |
| 45 | 6 | 0 | -7.031321 | -3.430580 | 0.168336  |
| 46 | 6 | 0 | -0.374188 | -8.108115 | 0.335751  |
| 47 | 6 | 0 | -1.727684 | -8.767352 | 0.010364  |
| 48 | 6 | 0 | 0.667480  | -8.618884 | -0.687897 |
| 49 | 6 | 0 | 0.046404  | -8.549930 | 1.757619  |
| 50 | 6 | 0 | 8.097191  | -0.873259 | 0.004606  |
| 51 | 6 | 0 | 6.621711  | -0.713072 | 0.002083  |
| 52 | 6 | 0 | 5.792655  | -1.592341 | 0.718656  |
| 53 | 6 | 0 | 4.409747  | -1.442363 | 0.715942  |
| 54 | 6 | 0 | 3.791625  | -0.405063 | -0.001751 |
| 55 | 6 | 0 | 4.620289  | 0.474670  | -0.717653 |
| 56 | 6 | 0 | 6.003078  | 0.323578  | -0.716665 |
| 57 | 6 | 0 | 8.945488  | 0.247087  | 0.018214  |
| 58 | 6 | 0 | 10.331065 | 0.096933  | 0.020182  |
| 59 | 6 | 0 | 10.900457 | -1.177439 | 0.009952  |
| 60 | 6 | 0 | 10.071017 | -2.300024 | -0.002968 |
| 61 | 6 | 0 | 8.685479  | -2.149488 | -0.006285 |
| 62 | 1 | 0 | -2.544473 | -6.408190 | -0.216735 |
| 63 | 1 | 0 | 1.629475  | -6.311788 | 0.816959  |
| 64 | 1 | 0 | 1.642387  | -3.900180 | 0.762738  |
| 65 | 1 | 0 | -4.832061 | -0.324367 | -0.609969 |
| 66 | 1 | 0 | -4.513204 | -4.610698 | -0.638222 |
| 67 | 1 | 0 | 2.401087  | 1.882553  | 0.181156  |
| 68 | 1 | 0 | 1.940369  | -2.338528 | -0.188170 |

|    |   |   |           |           |           |
|----|---|---|-----------|-----------|-----------|
| 69 | 1 | 0 | 2.447722  | 3.471930  | -0.773354 |
| 70 | 1 | 0 | 2.955363  | 5.829641  | -0.827385 |
| 71 | 1 | 0 | -1.097441 | 6.824060  | 0.215578  |
| 72 | 1 | 0 | -3.400892 | 5.498711  | 0.643090  |
| 73 | 1 | 0 | -4.647638 | 1.385559  | 0.610250  |
| 74 | 1 | 0 | 2.819403  | 9.342630  | 0.639981  |
| 75 | 1 | 0 | 2.188748  | 8.065516  | 1.696569  |
| 76 | 1 | 0 | 3.405645  | 7.682949  | 0.473128  |
| 77 | 1 | 0 | 2.179877  | 9.411387  | -1.825743 |
| 78 | 1 | 0 | 1.103376  | 8.178898  | -2.509249 |
| 79 | 1 | 0 | 2.756391  | 7.755314  | -2.048260 |
| 80 | 1 | 0 | -0.179355 | 8.776085  | 0.996641  |
| 81 | 1 | 0 | 0.540374  | 9.993380  | -0.061615 |
| 82 | 1 | 0 | -0.616185 | 8.834464  | -0.722245 |
| 83 | 1 | 0 | -6.893568 | 5.620600  | 1.333556  |
| 84 | 1 | 0 | -5.243949 | 5.803428  | 1.935978  |
| 85 | 1 | 0 | -5.577789 | 5.927316  | 0.197304  |
| 86 | 1 | 0 | -7.618718 | 3.656911  | 0.025215  |
| 87 | 1 | 0 | -6.532190 | 2.301698  | -0.301963 |
| 88 | 1 | 0 | -6.284298 | 3.844653  | -1.127682 |
| 89 | 1 | 0 | -6.043177 | 2.119395  | 2.250890  |
| 90 | 1 | 0 | -5.483852 | 3.544970  | 3.132633  |
| 91 | 1 | 0 | -7.148077 | 3.472545  | 2.524180  |
| 92 | 1 | 0 | -8.139344 | -1.422032 | -1.281341 |
| 93 | 1 | 0 | -7.013132 | -0.693026 | -0.133712 |
| 94 | 1 | 0 | -6.669548 | -0.642965 | -1.874247 |
| 95 | 1 | 0 | -7.612773 | -3.484605 | -2.531936 |
| 96 | 1 | 0 | -6.096071 | -4.359476 | -2.289012 |
| 97 | 1 | 0 | -6.087966 | -2.805311 | -3.130800 |
| 98 | 1 | 0 | -6.920764 | -2.922829 | 1.132019  |

|     |   |   |           |           |           |
|-----|---|---|-----------|-----------|-----------|
| 99  | 1 | 0 | -8.101998 | -3.551457 | -0.031885 |
| 100 | 1 | 0 | -6.598428 | -4.430439 | 0.267619  |
| 101 | 1 | 0 | -1.628752 | -9.856450 | 0.059391  |
| 102 | 1 | 0 | -2.505465 | -8.475402 | 0.723631  |
| 103 | 1 | 0 | -2.072832 | -8.512470 | -0.997009 |
| 104 | 1 | 0 | 0.734647  | -9.712135 | -0.651810 |
| 105 | 1 | 0 | 1.665426  | -8.217846 | -0.487861 |
| 106 | 1 | 0 | 0.389866  | -8.328646 | -1.706390 |
| 107 | 1 | 0 | 1.025982  | -8.150369 | 2.035913  |
| 108 | 1 | 0 | -0.677628 | -8.207168 | 2.503881  |
| 109 | 1 | 0 | 0.104567  | -9.642691 | 1.816515  |
| 110 | 1 | 0 | 6.240573  | -2.381808 | 1.314550  |
| 111 | 1 | 0 | 3.799735  | -2.114359 | 1.312072  |
| 112 | 1 | 0 | 4.170739  | 1.262282  | -1.314848 |
| 113 | 1 | 0 | 6.611924  | 0.998095  | -1.311049 |
| 114 | 1 | 0 | 8.513442  | 1.242656  | 0.054382  |
| 115 | 1 | 0 | 10.966996 | 0.977367  | 0.039170  |
| 116 | 1 | 0 | 11.980065 | -1.294590 | 0.012046  |
| 117 | 1 | 0 | 10.503372 | -3.296376 | -0.019872 |
| 118 | 1 | 0 | 8.050043  | -3.029207 | -0.044406 |

-----  
**Table S6.** Summary of photoluminescence data of **BN-Ad** and **BN-Ph** in solutions.

|                       | <b>BN-Ad</b>           |              | <b>BN-Ph</b>           |              |
|-----------------------|------------------------|--------------|------------------------|--------------|
|                       | $\lambda_{em}$<br>(nm) | FWHM<br>(nm) | $\lambda_{em}$<br>(nm) | FWHM<br>(nm) |
| Hexane (Hex.)         | 478                    | 19           | 480                    | 21           |
| Toluene (Tol.)        | 486                    | 21           | 486                    | 24           |
| Dichloromethane (DCM) | 488                    | 26           | 488                    | 26           |
| Tetrahydrofuran (THF) | 488                    | 26           | 488                    | 27           |



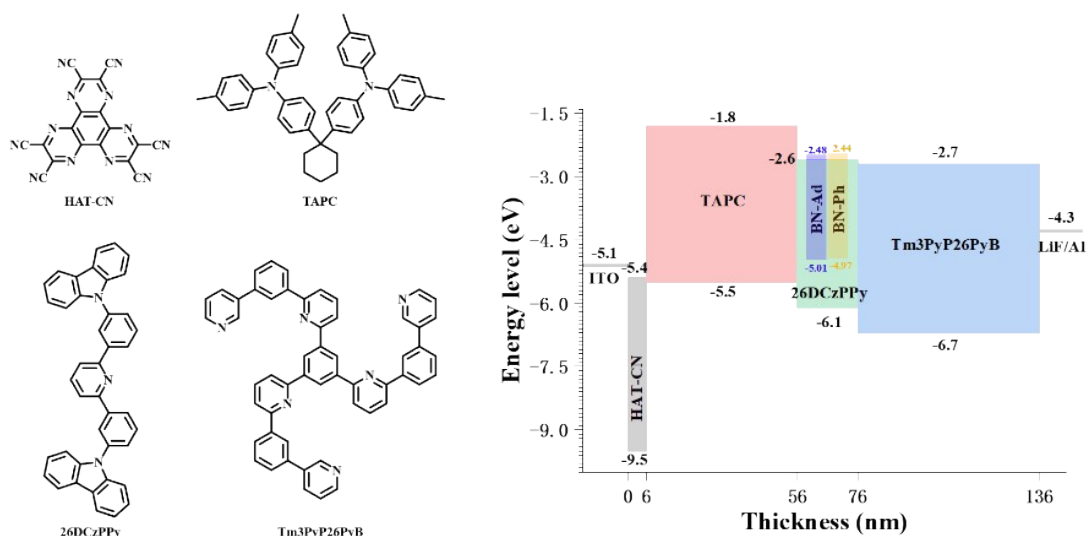

**Scheme S1.** Device architecture for the MR-TADF OLEDs with energy level alignment of the relevant materials.

## References

- (1) Dolomanov, O. V.; Bourhis, L. J.; Gildea, R. J.; Howard, J. A.; Puschmann, H. *OLEX2: a Complete Structure Solution, Refinement and Analysis Program. J. Appl. Cryst.* **2009**, *42*, 339-341.
- (2) Sheldrick, G. M. *SHELXT-Integrated Space-Group and Crystal-Structure Determination. Acta Cryst. A* **2015**, *71*, 3-8.
- (3) Sheldrick, G. M. *Crystal Structure Refinement with SHELXL. Acta Cryst. C* **2018**, *71*, 3-8.
- (4) Zhang, Q.; Kuwabara, H.; Potscavage, W. J.; Huang, S.; Hatae, Y.; Shibata, T.; Adachi, C. Anthraquinone-based Intramolecular Charge-Transfer Compounds: Computational Molecular Design, Thermally Activated Delayed Fluorescence, and Highly Efficient Red Electroluminescence. *J. Am. Chem. Soc.* **2014**, *136*, 18070-18081.
- (5) Zhang, Q.; Li, B.; Huang, S.; Nomura, H.; Tanaka, H.; Adachi, C. Efficient Blue Organic Light-Emitting Diodes Employing Thermally Activated Delayed Fluorescence. *Nat. Photonics* **2014**, *8*, 326-332.
- (6) Wu, T.-L.; Huang, M.-J.; Lin, C.-C.; Huang, P.-Y.; Chou, T.-Y.; Chen-Cheng, R.-W.; Lin, H.-W.; Liu, R.-S.; Cheng, C.-H. Diboron Compound-based Organic Light-Emitting Diodes with High Efficiency and Reduced Efficiency Roll-off. *Nat. Photonics* **2018**, *12*, 235-240.
